# Supplementary material
Source: ML conference proceedings conference paper supplement (https://openreview.net/forum?id=OndDxNGrqJ)
Supplement: supplementary_material [file attachment]

## 810 A DATASET STATISTICS

### 811 A.1 DATA PROCESSING

812 **Dataset Preparation** We received data from the PENCIL CODE team from the years 2015 to 2024.  
 813 The raw data consists of HTTP GET requests to the PENCIL CODE server corresponding to code  
 814 execution. With permission from the PENCIL CODE team, we only access the timestamp, a random  
 815 hash of the user ID, and the current program state code and title, which is included with the request  
 816 URL.<sup>15</sup> We construct program traces for a particular (username, title) pair by ordering all associated  
 817 program code with respect to the recorded timestamp and title.  
 818  
 819

820 We assume that the title used by the student reflects their goal and maps onto the program semantics,  
 821 as the raw data do not include other metadata about students’ goals (*e.g.*, , the actual assignment they  
 822 were solving). In some cases, this title may not provide sufficiently fine-grained information about a  
 823 student’s goal. For example, the common untitled, myprogram, and first titles often correspond  
 824 to a diverse set of kinds of traces.<sup>16</sup>

825 **Preprocessing** We construct traces from titles, timestamps, and programs as fol-  
 826 lows, where variables are bolded: `[title]<mask>...<mask><mask><start>CODE 1`  
 827 `(timestamp):\n[program]\n CODE 2 (timestamp):\n[program]\n...<|endoftext|>`.<sup>17</sup> We  
 828 randomly mask 15% of trace titles during training to facilitate experiments where we evaluate  
 829 models’ abilities to infer trace titles from code (§4.2). We remove empty program traces and last  
 830 programs for the last model. If consecutive programs are identical, we remove all but the last  
 831 program. For traces that are longer than GPT-2’s context window of 1024 tokens, we create as many  
 832 inputs to cover the trace in chunks of 1024 tokens, with 64 tokens of overlap between each chunk.  
 833

834 Table 1: Dataset Statistics

| Split                       | Total Traces | Unique Students | Unique Programs |
|-----------------------------|--------------|-----------------|-----------------|
| train                       | 2,941,032    | 1,110,554       | 260,428         |
| seen student/seen title     | 507,221      | 226,673         | 62,207          |
| seen student/unseen title   | 71,799       | 49,240          | 41,086          |
| unseen student/seen title   | 259,345      | 208,666         | 20,073          |
| unseen student/unseen title | 8,814        | 6,185           | 6,558           |

835 Table 2: Statistics on the different dataset splits discussed in §3.2.

### 836 A.2 REMOVING STUDENT PERSONALLY IDENTIFIABLE INFORMATION (PII)

837 As part of our agreement with the PENCIL CODE team to make student data publicly available, we  
 838 take further steps to prevent leakage of PII about school-age children. We first filter out person  
 839 names from all data splits using `nltk.corpus.names`, which consists of 5001 female names and  
 840 2943 male names, and replace them with `<UNK>` tokens. We then hand-examined a random set of  
 841 2000 independent log entries that contain either strings or comments with more than 10 characters  
 842 total in order to identify other kinds of PII captured in the data. In this sample, we observed **347**  
 843 names, though note this is a conservative estimate as some examples flagged include `cookie` and  
 844 `Times New Roman`. We additionally found **112** web links that potentially contained PII, such as  
 845 the flag of the student’s home country. We therefore replace all URLs with a special `<URL>` token.  
 846 Furthermore, **2** strings contained a student’s school name, and **2** contained geographic location –  
 847 because it is difficult to enumerate all potential locations, we instead chose a conservative approach  
 848 and replaced all strings containing only 1 or 2 words with `<UNK>` tokens (as we observed PII only  
 849 included in headers with independent strings for location). We did not observe any additional PII  
 850 such as phone numbers or email addresses. Finally, we observed that there were some assignments  
 851

852 <sup>15</sup>This use of the data was classified as exempt by our institution’s IRB.

853 <sup>16</sup>We observed that for `first` traces, users frequently appeared to switch between goals mid-trace, *e.g.*, `first`  
 854 starting with `speed 2`; `pen red`, which is the provided PENCIL CODE default.

855 <sup>17</sup>There are most 50 tokens for the trace title and mask tokens.

(*e.g.*, name) where students were tasked with creating a program that graphically drew their name on the PencilCode interface. As this is a form of PII, we drop all program traces with assignment titles containing name (*i.e.*, including myname).

Removing PII from the data naturally affects the model. Therefore, all results reported in the paper use the original dataset, while we release, both all filtered data and a trace model trained on the filtered training data split.

### A.3 DOWNSAMPLING

To create the downsampled datasets for the trace and synthetic models, we continue pruning the traces in their respective training datasets until the ratio of [the difference in number of tokens in the datasets] to [the number of tokens in the last dataset] is less than or equal to 0.001.

## B TRAINING DETAILS

We continually train models with a batch size of 32 for a maximum of 3 epochs, with early stopping based on evaluations every 1000 steps (patience = 20). We use 2% of the training data as validation data during training. We train with a learning rate of  $5e - 5$  with a linear learning rate scheduler and Adam optimizer. Each model was trained on an A100 GPU on an internal cluster for around 2 weeks.

## C OLMo-2 RESULTS

| Model             | seen student                        | unseen student                      | seen student                        |
|-------------------|-------------------------------------|-------------------------------------|-------------------------------------|
|                   | seen title                          | seen title                          | unseen title                        |
| last              | $0.262 \pm 0.013$                   | $0.246 \pm 0.013$                   | $0.042 \pm 0.005$                   |
| trace downsampled | <b><math>0.284 \pm 0.013</math></b> | <b><math>0.276 \pm 0.013</math></b> | <b><math>0.059 \pm 0.006</math></b> |

Table 3: BLEU score evaluation results for different splits. The best-performing cell for each column is bolded. We evaluate the best-performing checkpoints for each model after up to 3 epochs of training. Results are for 100 randomly sampled titles corresponding to PENCIL CODE assignments. We sample 10 generations for each title and model.

## D METRICS

**Successful Execution** We measure whether a program successfully executes by using a headless browser to attempt to execute the student-written code. First, we append `console.log("END_REACHED")` to the end of the following HTML template:

```
<!doctype html>
<html>
<body><script src="https://pencilcode.net/turtlebits.js" crossorigin="anonymous"
type="text/javascript"></script><script type="text/LANGUAGENAME">
INSERT_CODE_HERE
</script></body></html>
```

We replace `LANGUAGENAME` with `coffeescript` or `javascript` depending on the language of the code. We replace `INSERT_CODE_HERE` with the student’s program.

We first start with CoffeeScript language. Using a headless browser, we open the HTML file and check if the text `END_REACHED` is logged to the console, using at most 5 seconds for page navigation and 5 seconds for execution:

1. If no error occurs and `END_REACHED` is logged to the console, we consider the program to have successfully executed. We skip all other steps.

- 918 2. If an error is reached, we move to step (4).  
 919  
 920 3. If the page navigates without an error or END\_REACHED being logged, it is unclear whether the  
 921 program timed out because of a system delay *external* to the program causing the execution  
 922 to not reach an error that otherwise would have occurred. Therefore, we retry execution with  
 923 a longer timeout (adding 100 seconds to both the page navigation and execution timeouts),  
 924 *unless* the code contains any of the following keywords: `await`, `forever` (with no `stop()`),  
 925 or `prompt`. If one of these keywords is present, we do not retry execution, as we expect these  
 926 programs to run indefinitely, and move to step (4). If after retrying with longer timeouts,  
 927 there is still no error or END\_REACHED logged, we move to step (4).  
 928 4. We attempt to execute the code in JavaScript instead of CoffeeScript, starting at step (1).  
 929

930 We run programs in both CoffeeScript and JavaScript because students could have written their code  
 931 in either language on PENCIL CODE. If both languages do not lead to successful execution, we  
 932 consider the execution unsuccessful. If one language leads to successful execution, we consider the  
 933 execution successful.  
 934

## 935 E SAMPLING GENERATIONS

936 For the core behavioral evaluations in (§4.1), we collect 5 samples from each model for each unique  
 937 student ID and title pair. For each metrics, we calculate correlation with the mean value across  
 938 samples and the ground truth, except for Self-BLEU, for which we report the score across the 5  
 939 samples.  
 940  
 941

942 Because full student program traces often exceed limit of 1024 output tokens, we repeatedly generate  
 943 3 times, stopping sooner if an `|endof text|` token is generated. If the last program of the generated  
 944 text does not contain `|endof text|`, we then treat the preceding program as the final state.  
 945

## 946 F BEHAVIORAL RESULTS WITH FILTERING

947 See Figure 9.  
 948  
 949  
 950

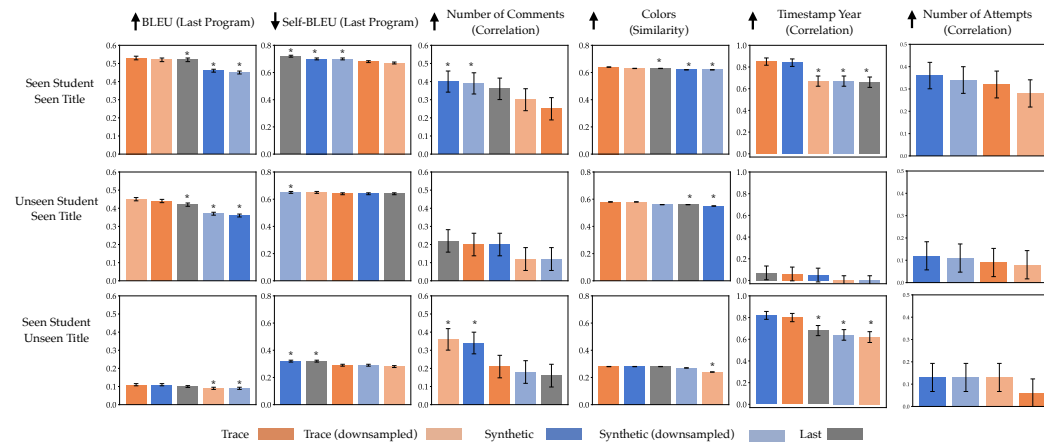

951  
 952  
 953  
 954  
 955  
 956  
 957  
 958  
 959  
 960  
 961  
 962  
 963  
 964  
 965  
 966 **Figure 9: Correlation of Generated Trace Properties with Ground Truth (Final Program State)**  
 967 We evaluate the generated final program state of a trace from sampling all models across evaluation  
 968 splits. Correlation denotes Pearson’s correlation coefficient. The Colors metric compares the cosine  
 969 similarity of between program color embeddings. \* indicates a statistically significant difference  
 970 with the trace model using a paired T-test between unique (student, title) pairs at  $p = 0.05$  with  
 971 Bonferroni correction, and error bars indicate standard errors of the mean.

## 972 G ADAPTING TO NEW STUDENTS

973  
974 We finetune the trace model for up to 100 epochs with early stopping patience of 10. We use a batch  
975 size of 32 and learning rate of  $5e-4$  with no masking of program names. We freeze all model weights  
976 except the parameters of the student embedding MLP. We keep the bias terms of the MLP frozen.

977 We use 5% of the unseen students for hyperparameter selection to determine the optimal number of  
978 training epochs. We first train on the 5% hyperparameter selection set with early stopping, identify  
979 the best epoch, and then train the remaining 95% of students for that number of epochs.

980 We generate rollouts for a sample of 100 of the students whose traces are finetuned on. We filter  
981 degenerate traces, *i.e.*, those that do not have any matched programs, then evaluate on the intersecting  
982 subset of held out data for all values of  $k$  after filtering. At most 0.01% of generated traces are filtered  
983 for any given  $k$ .  
984

## 985 H PROBING STUDENT EMBEDDINGS

986 To construct student embeddings, we probe the first layer of the student embedding module (a 2-layer  
987 MLP with embedding dimension = 768 and hidden dimension = 64).

988 The probe models are MLP regressors with 2 hidden layers, each with size 100. We train the probes  
989 for a maximum of 5,000 iterations with learning rate 0.001, batch size 64, and early stopping.  
990

## 991 I PROBING CODE EMBEDDINGS

992 We present details on our experiments probing code embeddings (§4.2).

993  
994 **Constructing Datasets for Probes** Let a trace for student  $s$  and assignment  $a$  be denoted by  
995  $\tau = (p_0, p_1, \dots, p_T)$ , where  $p_0$  is the initial empty program (containing only the CODE prefix)  
996 and  $p_T$  is the final program. For each  $\tau$ , we consider all prefixes up to each time step  $t$ , *i.e.*,  
997 for  $t = 0, 1, \dots, T$ , the prefix  $\tau_{:t} = (p_0, p_1, \dots, p_t)$ . For each prefix  $\tau_{:t}$ , we construct an input  
998  $x = (\tau_{:t}, s, a)$ , consisting of the programs in the prefix, the student ID, and the trace title. We then  
999 obtain a code embedding  $e = f_{\text{trace}}(x)$  by conditioning the trace model on  $x$  and taking the mean of  
1000 the token embeddings at the last layer.<sup>18</sup> For each property, we construct a dataset  $\mathcal{D} = \{(e^j, y^j)\}_{j=1}^N$   
1001 where  $e^j$  is the embedding for input  $x^j$ , and  $y^j$  is the property to be predicted. We exclude any  $x$   
1002 whose tokenized length exceeds GPT-2’s context window.  
1003  
1004  
1005  
1006

1007  
1008 **Filter Probing Datasets** We filter the probing datasets to remove confounders in the metrics. For  
1009 example, to predict whether the student will deviate from their goal (the final program), we only  
1010 include prefixes that do not contain the final program in the trace, *i.e.*,  $D = \{x^j : \tau_{:t}^j \neq \tau_{:T}^j\}$ . For  
1011 probing trace title, we set  $D = \{x^j : \tau_{:t}^j \neq \tau_{:0}^j\}$ , *i.e.*, we only include inputs that contain some code  
1012 (excluding the initial empty program). For predicting whether the program is the final program, we do  
1013 not filter  $\mathcal{D}$  (we include all inputs). For all other metrics, we only include inputs that do not contain  
1014 the final trace. The reasons are twofold: First, we wish to avoid possible leakage from the final  
1015 program (*e.g.*, predicting whether the final program will be correct is not a future-looking metric if  
1016 the final program is given in the input). Second, because many of the metrics correlate with whether  
1017 the program is the final program (*e.g.*, the edit distance to the final program is 0 if the program is the  
1018 final program), a probe may rely on information in the input about whether the program is final and  
1019 make its predictions based on this information, rather than making sophisticated inferences about the  
1020 metric directly; given that we already have a metric directly predicting whether the program is the  
1021 final program, we remove this confounder in probing for other metrics by filtering  $\mathcal{D}$  to only include  
1022 inputs that do not contain the final program in the trace, *i.e.*,  $\{x^j : \tau_{:t}^j \neq \tau_{:T}^j\}$ .

1023 **Probes** We train a single probe on the filtered dataset for each metric. The probes are ridge  
1024 regressors and classifiers, implemented using the scikit-learn RidgeCV and RidgeClassifierCV  
1025

<sup>18</sup>See §I for justification using Centered Kernel Alignment (Kornblith et al., 2019).

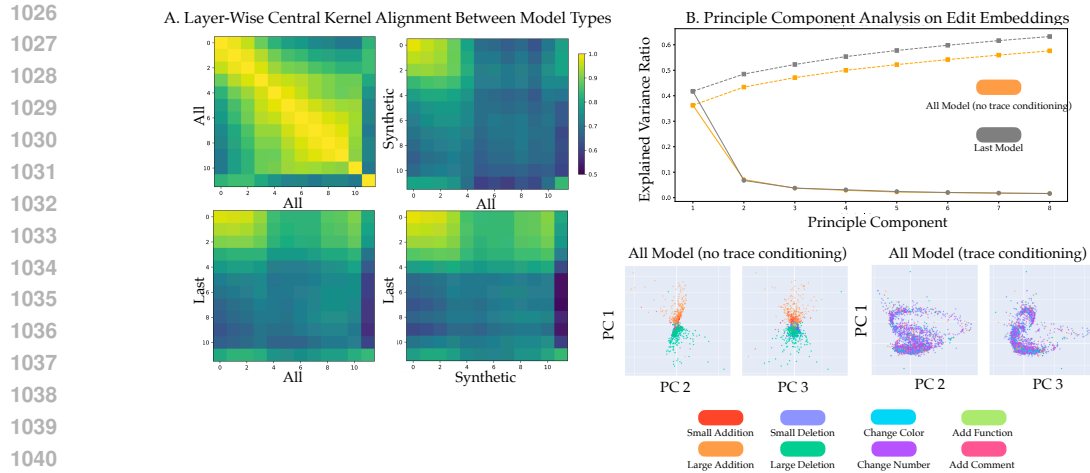

Figure 10: (Left) Running Central Kernel Alignment Kornblith et al. (2019) on code embeddings across layers of the trace, synthetic, and last models shows that the three models differ significantly in the last embedding layer, with the last model causing asymmetry. (Right) Running PCA on the differences between two consecutive program states in a trace results shows that embeddings encode information relevant to the edit type (e.g. small addition).

classes. We perform cross-validation to pick the value of  $\alpha$ , *i.e.*, the regularization parameter, from the set of values  $\alpha \in \{1, 1e-1, 1e-2, 1e-3, 1e-4, 1e-5, 1e-6, 1e-7\}$ .

**Embedding Analysis** Finally, we take a closer look at the learned embeddings across the trace, last, and synthetic models to better understand their representational differences. We first measure similarity between embeddings across all layers for each pair of modes, and find strongest differences in the last layer, particularly for the last model trained only on final program states (Figure 10). When running Principle Component Analysis (with 8 components) on the trace and last model, the first two principle components explain more variance in the data for the last model, suggesting that the trace model learns more complex representations. Finally, we observe that the first two principle components are well aligned with student edit types (e.g., small addition), though conditioning on an entire trace leads to more complex structure.

## J MODEL STEERING

We showed in Section §4.5 that we can improve assisted error recovery with the trace model by using a “strong student embedding” instead of the original. To find this embedding, we sort all students in our training dataset by the average goal backtracking metric across their program traces. We then selected the student with the lowest degree of backtracking who had completed more than 20 different programs. Future work can identify other attributes for model steering via student embeddings, such as the language used in any text (e.g., Greek), certain colors, or high speeds for interactive programs.

We additionally trained a more complex synthetic-complex model where the synthetic edits can either add or delete any number of lines from any location in the current program state. Therefore, any two arbitrary program states can be connected with a sequence of edits. We find that, for error recovery, the “trace” model still outperforms the synthetic-complex model, which only slightly outperforms the synthetic model at lower values for time (x-axis, see Figure 8). Results for synthetic-complex include the following values:

On a qualitative level, we believe the reason for this poor performance is that the method for creating synthetic-complex treats all lines equally, and is not able to capture how some aspects of a program (e.g., a function definition) are more susceptible to incorrect implementations than others, hindering error recovery.

|      | Time (s) | Trace % Correct | Synthetic % Correct | Synthetic-Complex % Correct |
|------|----------|-----------------|---------------------|-----------------------------|
| 1080 |          |                 |                     |                             |
| 1081 | 0.01     | 0.64            | 0.39                | 0.41                        |
| 1082 | 1        | 0.60            | 0.39                | 0.40                        |
| 1083 | 60       | 0.64            | 0.45                | 0.40                        |

Table 4: Performance across different time scales.

## K EXAMPLE PENCIL CODE ASSIGNMENTS

PENCIL CODE assignments vary in terms of complexity. Here we provide examples of two common assignments in our dataset with a moderate degree of complexity, showing that our dataset extends beyond simple introductory tasks.

### Riddle Assignment

```

1094 # This function looks at the words in your
1095 # answer and picks the troll's response.
1096 replyto = (a) ->
1097   for word in a.toLowerCase().split /\W+/
1098     switch word
1099       when "secret"
1100         return "Right."
1101       when "money"
1102         return "I don't want your money!"
1103       when "advice"
1104         return "My advice: think again."
1105       when "who"
1106         return "I am the Bridge Troll!"
1107       when "troll"
1108         return "The troll laughs at you."
1109       when "know"
1110         return "I know the answer. Do you?"
1111 # If no words were recognized, a random
1112 # canned response is picked.
1113 return random [
1114   "That doesn't make sense."
1115   "Guess again!"
1116   "That is not right!"
1117 ]
1118
1119 riddle = ->
1120   write ""
1121   A troll blocks the bridge and asks:
1122   ""
1123   type ""
1124     When you don't have me,
1125     you want me,
1126     but when you do have me,
1127     you want to give me away.
1128     What am I?
1129   ""
1130   while s isnt "Right."
1131     # Wait for an answer and reply to it.
1132     await readstr defer a
1133     s = replyto a
1134     write s
1135   do proceed
1136
1137 proceed = ->

```

```
1134     write ""
1135         The troll steps aside, and you cross.
1136         (what happens next?)
1137     ""
1138
1139 # start the game
1140 do riddle
1141
1142 Rhythm Assignment
1143
1144     clapsound =
1145     wave: 'noise'
1146     attack: .01
1147     decay: .1
1148     gain: .5
1149     cutfollow: 4
1150     resonance: 10
1151
1152     lowdrum =
1153     wave: 'noise'
1154     attack: .06
1155     decay: .15
1156     gain: 10
1157     cutfollow: 0.7
1158     resonance: 5
1159
1160     blocksound =
1161     wave: 'noise'
1162     attack: .05
1163     decay: .1
1164     gain: 0.3
1165     cutfollow: 3
1166     resonance: 5
1167
1168     clap = img 'percussion-clap', 100
1169     block = img 'percussion-woodblock', 100
1170     drum = img 'percussion-timpani', 100
1171     sync clap, block, drum
1172
1173     for i in [1..3]
1174     clap.play
1175         timbre: clapsound
1176         tempo: 100
1177         song: "zc/c/ccc/c/c/c//c/c//cz/"
1178
1179     for i in [1..3]
1180     block.play
1181         timbre: blocksound
1182         tempo: 100
1183         song: "z/G/GGGz/G/GGG"
1184
1185     for i in [1..3]
1186     drum.play
1187         timbre: lowdrum
1188         tempo: 100
1189         song: "DDDDDDDD"
```
